# Supplementary material for: Aminophthalimide as a mimetic of purines and a fluorescent RNA base surrogate for RNA imaging
Source: Royal Society of Chemistry journal article supplement (doi:10.1039/d3ob00302g), 2023-01-01
Supplement: d3ob00302g1.pdf [file d3ob00302g1.pdf]

## **Aminophthalimide as mimetic of purines and fluorescent RNA base surrogate for RNA imaging**

Fabian Lang, Franziska Röncke and Hans-Achim Wagenknecht

Institute of Organic Chemistry, Karlsruhe Institute of Technology (KIT), Fritz-Haber-Weg 6,  
76131 Karlsruhe, Germany, E-Mail: Wagenknecht@kit.edu

### **Supporting Information**

#### **Content**

|                          |         |
|--------------------------|---------|
| 1. Materials and methods | page 2  |
| 2. Images of MS analyses | page 5  |
| 3. UV/Vis absorption     | page 7  |
| 4. Melting temperature   | page 8  |
| 5. References            | page 12 |

## 1. Materials and methods

**RNA synthesis.** The oligonucleotides were synthesized under an argon atmosphere on an H-6 DNA/RNA synthesizer from K&A LABORGERÄTE. Controlled pore glass (CPG) with 1  $\mu\text{mol}$  (500 Å) was used as the solid phase. All reagents, phosphoramidites, solvents and CPG columns were obtained from GlenResearch and Sigma Aldrich. To ensure a more effective clutch, the more reactive Activator 42® was used. To ensure RNase-free working, all phosphoramidite tubes were rinsed with ethanol and acetonitrile. The RNA building blocks for the **APht1**, **APht2** and **Dap** modifications were identical to the published DNA building blocks.<sup>1,2</sup> The coupling times were increased due to the sterically demanding 2'-O-TBDMS protecting group. The CPG columns of **RNA1** and **RNA2** were dried under high vacuum, opened and the CPG transferred to an Eppendorf vial equipped with a safe-lock lid. 1 mL 0.5 M DBU and 40 mM thymine in pyridine were added and the mixture was incubated overnight at room temperature. The suspension was centrifuged (3 min, 13000 rpm), the supernatant was pipetted off, the CPG was washed three times with dry pyridine and dried under high vacuum. The solid phase was transferred to an Eppendorf vial with a safe-lock lid. 1 mL  $\text{K}_2\text{CO}_3$  solution (0.05 M in MeOH) was added and kept overnight at room temperature. 6  $\mu\text{L}$  glacial acetic acid was added for neutralization, the solution was pipetted off and the CPG was washed three times with 300  $\mu\text{L}$  RNase-free water. The solvent was removed using a Christ Alpha RVC vacuum concentrator and the samples were lyophilized using a Christ Alpha 1-2 LD Plus lyophilizer. **RNAD** was cleaved from the resin using conventional methods. To cleave the 2'-O-TBDMS protecting groups lyophilized **RNA1**, **RNA2** and **RNAD** were suspended in 300  $\mu\text{L}$  DMSO. 300  $\mu\text{L}$   $\text{NEt}_3 \cdot 3\text{HF}$  was added and the samples incubated for 2.5 hours at 60 °C. After cooling to room temperature 600  $\mu\text{L}$  isopropyl trimethylsilyl ether and 10 mL diethyl ether were added and the solution stored over night at -32 °C. The suspension was centrifuged (3 min, 13000 rpm), the supernatant was pipetted off, the precipitated RNA washed with 80% ethanol (3 x 1 mL) and lyophilized. Unmodified RNA strands (**RNAA**, **RNAC**, **RNAU**, **RNAG**) and modified **RNAS** were purchased from Metabion. The RNA samples were dissolved in a defined amount of RNase-free water and the concentration was then determined via the absorption at  $\lambda = 260 \text{ nm}$  using  $\epsilon_{260} = 22.7 \text{ mM}^{-1}\text{cm}^{-1}$  for **APht1**,  $12.4 \text{ mM}^{-1}\text{cm}^{-1}$  for **APht2** and  $2.24 \text{ mM}^{-1}\text{cm}^{-1}$  for **Dap**.

**Table S1.** Standard RNA coupling protocol.

|                 | Time<br>[0.1 s] | Reagent<br>1 | Reagent 2 | Target | S.Col.Ptr. | Time<br>[s] | Branch |
|-----------------|-----------------|--------------|-----------|--------|------------|-------------|--------|
| <b>COUPLING</b> |                 |              |           |        |            |             |        |
| 1               | 15              | GAS          |           | COL    |            | 2           |        |
| 2               | 4               | TET          |           | COL    | ON         |             |        |
| 3               |                 |              |           |        | ON         |             |        |
| 4               |                 |              |           |        |            | 2           | 1      |
| <b>BRANCH</b>   |                 |              |           |        |            |             |        |
| 1               | 4               | TET          |           | COL    | ON         |             |        |
| 2               | 6               | AMD          | TET       | COL    |            |             |        |
| 3               |                 |              |           |        | ON         |             |        |
| 4               |                 |              |           |        |            | 99          |        |
| 5               |                 |              |           |        |            | 99          |        |
| 6               | 6               | AMD          | TET       | COL    | ON         |             |        |
| 7               |                 |              |           |        | ON         |             |        |
| 8               |                 |              |           |        |            | 99          |        |
| 9               |                 |              |           |        |            | 99          |        |
| 10              | 6               | AMD          | TET       | COL    | ON         |             |        |
| 11              |                 |              |           |        | ON         |             |        |
| 12              |                 |              |           |        |            | 99          |        |

|                 |    |     |  |     |    |    |  |
|-----------------|----|-----|--|-----|----|----|--|
| 13              |    |     |  |     |    | 99 |  |
| 14              | 5  | TET |  | COL | ON |    |  |
| 15              |    |     |  |     | ON |    |  |
| 16              | 20 | ACN |  | M_W |    |    |  |
| 17              | 20 | GAS |  | M_W |    |    |  |
| <b>Coupling</b> |    |     |  |     |    |    |  |
| 1               |    |     |  |     |    | 90 |  |
| 2               | 10 | ACN |  | M_W |    | 90 |  |
| 3               | 10 | ACN |  | COL | ON |    |  |
| 4               |    |     |  |     | ON |    |  |
| 5               | 35 | GAS |  | COL |    |    |  |
| 6               | 20 | GAS |  | M_W |    |    |  |

**Table S1.** RNA protocol for coupling of the modified RNA building blocks for **APht1**, **APht2** and **Dp**.

|               | Time<br>[0.1 s] | Reagent 1 | Reagent 2 | Target | S.Col.Ptr. | Time<br>[s] | Branch |
|---------------|-----------------|-----------|-----------|--------|------------|-------------|--------|
| <b>BRANCH</b> |                 |           |           |        |            |             |        |
| 1             | 4               | TET       |           | COL    | ON         |             |        |
| 2             | 4               | AMD       | TET       | COL    |            |             |        |
| 3             |                 |           |           |        | ON         |             |        |
| 4             |                 |           |           |        |            | 99          |        |
| 5             |                 |           |           |        |            | 99          |        |
| 6             |                 |           |           |        |            | 99          |        |
| 7             |                 |           |           |        |            | 99          |        |
| 8             |                 |           |           |        |            | 99          |        |
| 9             |                 |           |           |        |            | 99          |        |
| 10            |                 |           |           |        |            | 99          |        |
| 11            |                 |           |           |        |            | 99          |        |
| 12            | 4               | AMD       | TET       | COL    | ON         |             |        |
| 13            |                 |           |           |        | ON         |             |        |
| 14            |                 |           |           |        |            | 99          |        |
| 15            |                 |           |           |        |            | 99          |        |
| 16            |                 |           |           |        |            | 99          |        |
| 17            |                 |           |           |        |            | 99          |        |
| 18            |                 |           |           |        |            | 99          |        |
| 19            |                 |           |           |        |            | 99          |        |
| 20            |                 |           |           |        |            | 99          |        |
| 21            |                 |           |           |        |            | 99          |        |
| 22            | 5               | TET       |           | COL    | ON         |             |        |
| 23            |                 |           |           |        | ON         |             |        |
| 24            | 20              | ACN       |           | M_W    |            |             |        |
| 25            | 20              | GAS       |           | M_W    |            |             |        |

**RNase-free working.** Certified RNase-free consumables (Eppendorf tubes, pipette tips, falcons) were used for working with RNA. Glassware was heated overnight in a drying cabinet at 200 °C. Gloves and surfaces were previously disinfected with ethanol. To produce RNase-free water, deionized water with 0.1% diethyl pyrocarbonate (DEPC) was stirred at room temperature for about 2 h and then heated to the boiling point for 2 h to destroy excess DEPC.

**High Performance Liquid Chromatography (HPLC).** The synthesized oligonucleotides were purified on a ThermoFisher system (Dionex UltiMate3000 with autosampler, pump module, column oven, multidiode array, RS fluorescence detector, fraction collector) using the

Chromeleon 7 software). For the semi-preparative separation, a reversed-phase Supelco Discovery® BIO Wide Pore C18 column (250 x 10 mm, 5 µm) was used with a flow rate of 2.5 mL/min. A VDSpher OptiBio PUR 300 S18-SE column (250 x 4.6 mm, 5 µm) with a flow rate of 1.0 mL/min was used for analytical chromatography. A 100 mM ammonium bicarbonate buffer (component A, RNase-free, DEPC-treated) was used as the mobile phase for the purification of RNA. The respective sample could be eluted with an increasing acetonitrile gradient (0-15% B in A over 50 min, 60 °C). Detection was at a wavelength of  $\lambda = 260$  nm.

**MALDI-TOF MS.** Mass spectrometry was performed using a Shimadzu Axima Confidence Spectrometer using the following matrix: 3-hydroxypicolinic acid (saturated in MeCN:H<sub>2</sub>O=1:1) / diammoniumhydrogencitrat (0.44 M in H<sub>2</sub>O) = 9:1.

**Optical Spectroscopy.** The optical-spectroscopic characterization of the synthesized RNA was carried out in Starna quartz glass cuvettes (path length 1 cm, sample volume 1 mL) at a temperature of 20 °C. The spectra were baseline corrected using the respective solvent. UV/Vis absorption was measured on a Varian Cary 100 Bio spectrometer with a temperature-controlled cell holder (Cary 100 temperature controller) using the Cary WinUV Scan Application software. The following parameters were selected: averaging time 0.1 s, data interval 1.0 nm, scanning speed 600 nm/min, lamp change 350 nm. The melting temperatures of oligonucleotide duplexes were measured on the same device using the Thermal program as software. The change in absorption of the oligonucleotides was detected at 260 nm in a temperature range of 10-90 °C (heating or cooling rate 0.7 °C/min, recording of the measurement data per 0.5 °C). The temperature at the start and end point was maintained for 10 min each. Fluorescence was measured on a Horiba Fluoromax-4. The spectra were corrected for the Raman scattering of the pure solvent. The following parameters were used for the measurements: step size 1.0 nm, increment time 0.2 s, integration time 0.1 s, slit widths 2 nm, 3 nm or 9 nm.

**Table S3.** Extinction coefficients  $\epsilon_{260}$  and MALDI-TOF MS analyses **RNA1**, **RNA2** and **RNAD**. The small differences between calcd. and found m/z data is due to the inaccuracy of the MALDI-TOF-MS instrument.

| RNA         | $\epsilon_{260}$ [mM <sup>-1</sup> cm <sup>-1</sup> ] | m/z calcd. [gmol <sup>-1</sup> ] | m/z found [gmol <sup>-1</sup> ] |
|-------------|-------------------------------------------------------|----------------------------------|---------------------------------|
| <b>RNA1</b> | 135.5                                                 | 4148.8                           | 4145.2                          |
| <b>RNA2</b> | 125.2                                                 | 4176.8                           | 4172.5                          |
| <b>RNAD</b> | 115.1                                                 | 4096.8                           | 4097.9                          |

## 2. Images of MS analyses

%Int. 28 mV[sum= 1777 mV] Profiles 1-64 Smooth Av 30 -Baseline 300

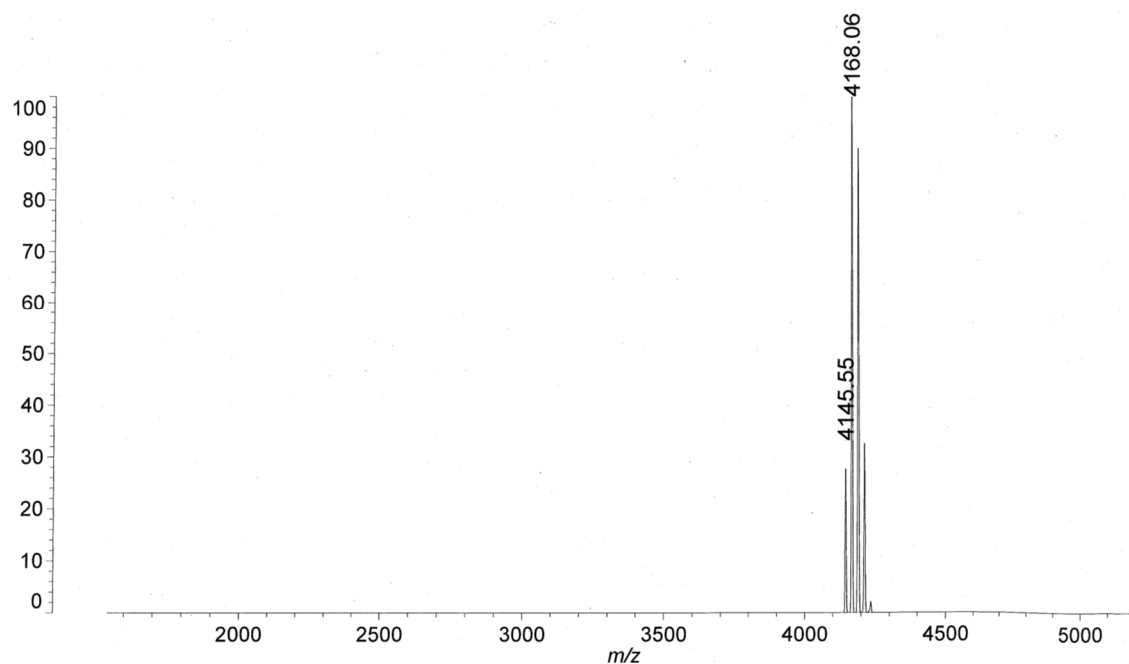

**Figure S1.** MALDI-TOF MS analysis of **RNA1**.

%Int. 42 mV[sum= 1874 mV] Profiles 1-45 Smooth Av 30 -Baseline 300

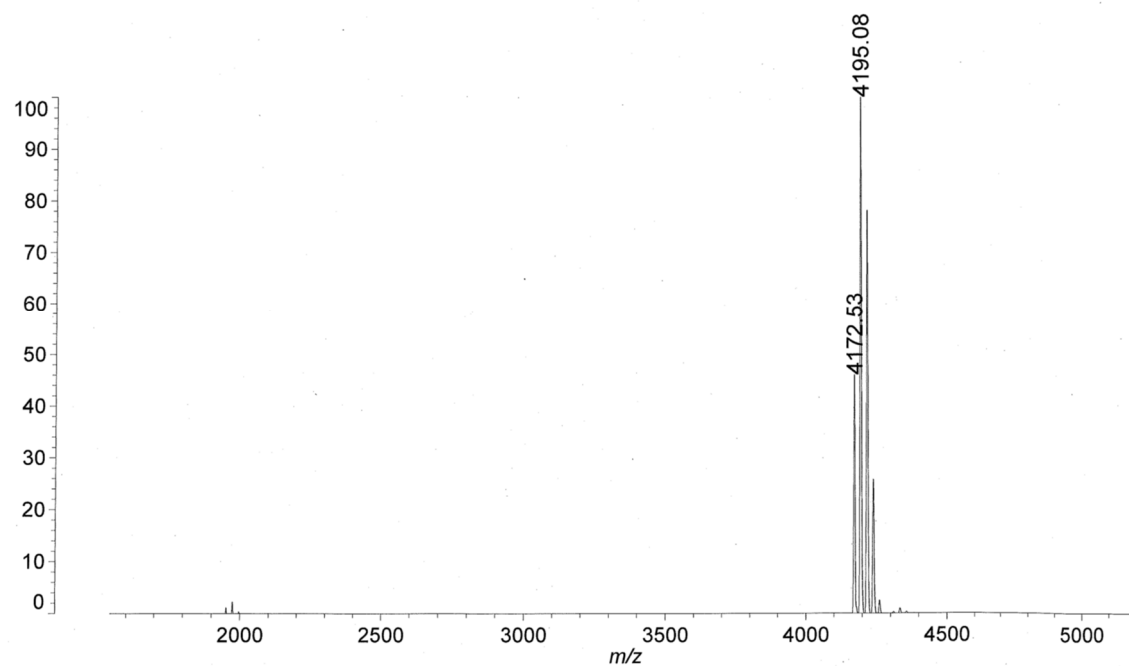

**Figure S2.** MALDI-TOF MS analysis of **RNA2**.

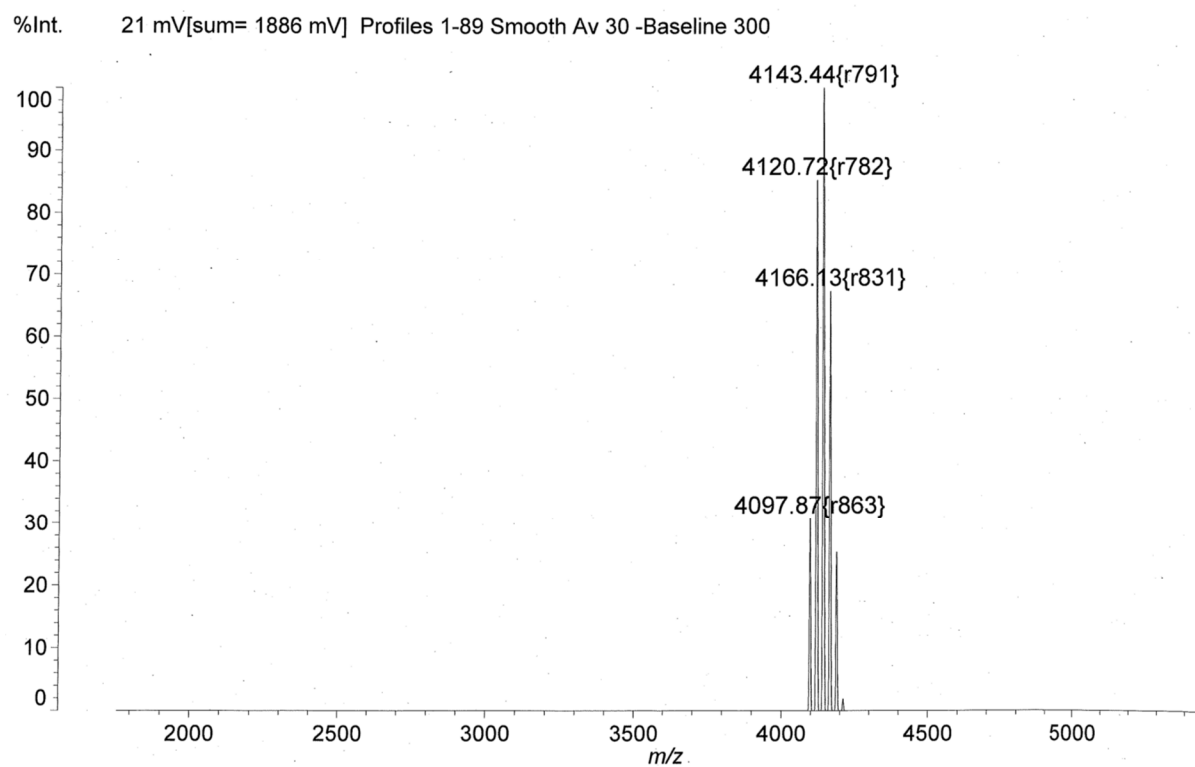

**Figure S3.** MALDI-TOF MS analysis of **RNAD**.

### 3. UV/Vis absorbances

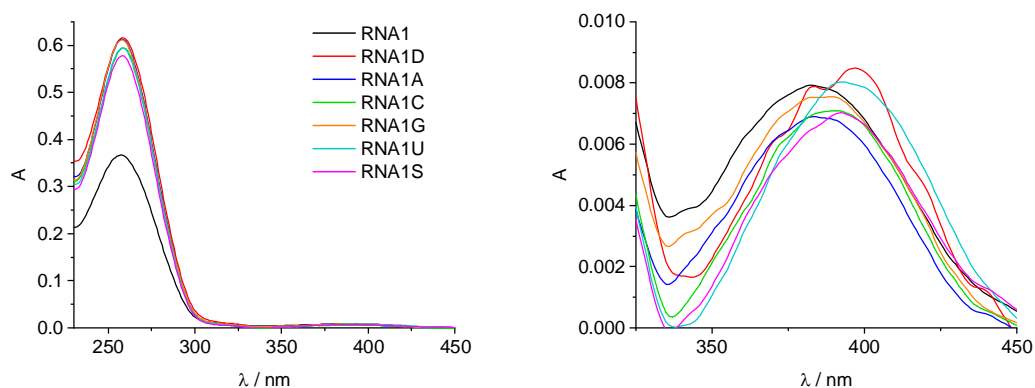

**Figure S4.** UV/Vis absorbance of **RNA1-RNAX** (X=A, C, G, T, D, S); 2.5  $\mu$ M RNA, 10 mM Na-P<sub>i</sub> buffer, 250 mM NaCl, pH 7, 20 °C.

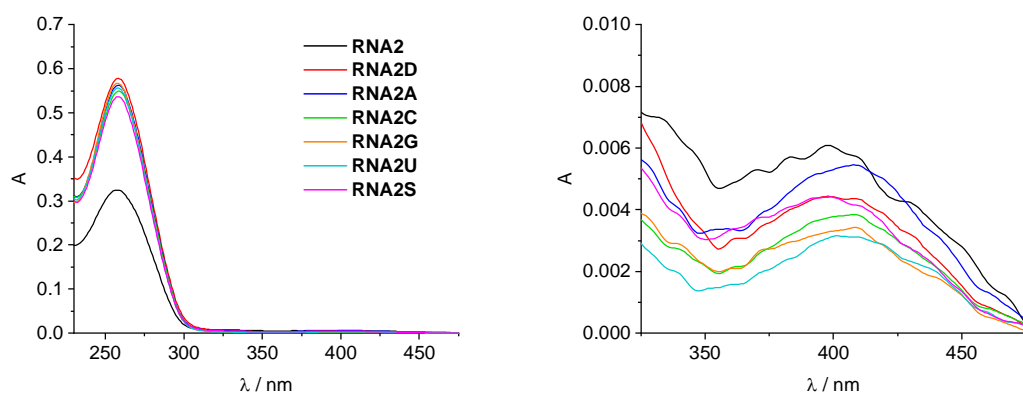

**Figure S5.** UV/Vis absorbance of **RNA2-RNAX** (X=A, C, G, T, D, S); 2.5  $\mu$ M RNA, 10 mM Na-P<sub>i</sub> buffer, 250 mM NaCl, pH 7, 20 °C.

#### 4. Melting temperatures

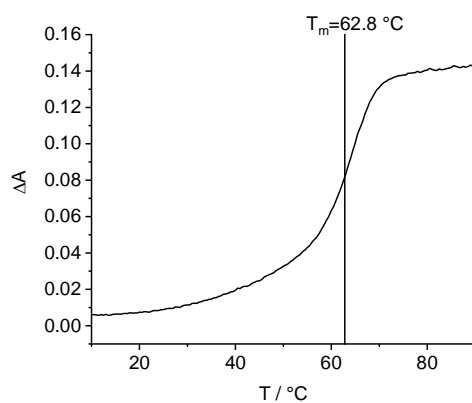

**Figure S6.** Melting profile of **RNA1-RNAD**; 2.5  $\mu\text{M}$  RNA, 10 mM Na-Pi buffer, 250 mM NaCl, pH 7, 20  $^\circ\text{C}$ , 0.7  $^\circ\text{C}/\text{min}$ .

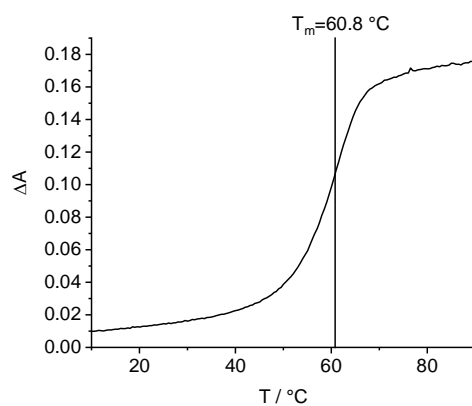

**Figure S7.** Melting profile of **RNA1-RNAA**; 2.5  $\mu\text{M}$  RNA, 10 mM Na-Pi buffer, 250 mM NaCl, pH 7, 20  $^\circ\text{C}$ , 0.7  $^\circ\text{C}/\text{min}$ .

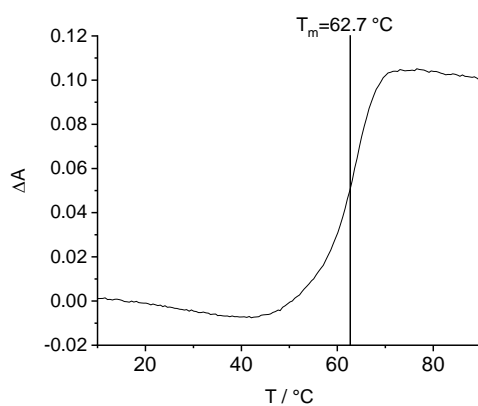

**Figure S8.** Melting profile of **RNA1-RNAC**; 2.5  $\mu\text{M}$  RNA, 10 mM Na-Pi buffer, 250 mM NaCl, pH 7, 20  $^\circ\text{C}$ , 0.7  $^\circ\text{C}/\text{min}$ .

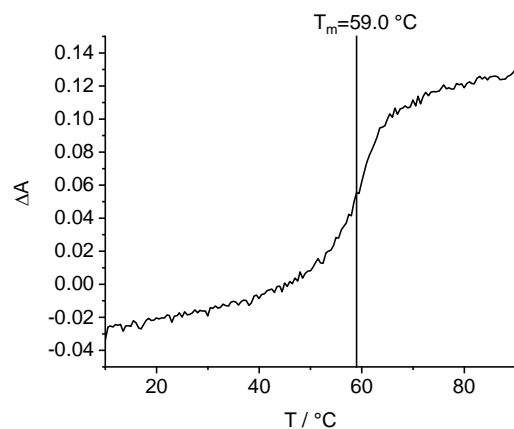

**Figure S9.** Melting profile of **RNA1-RNAG**; 2.5  $\mu\text{M}$  RNA, 10 mM Na-Pi buffer, 250 mM NaCl, pH 7, 20  $^\circ\text{C}$ , 0.7  $^\circ\text{C}/\text{min}$ .

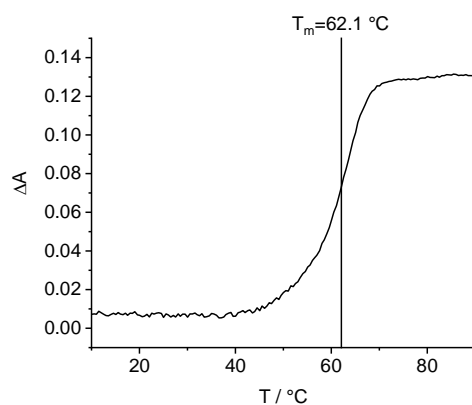

**Figure S10.** Melting profile of **RNA1-RNAU**; 2.5  $\mu\text{M}$  RNA, 10 mM Na-Pi buffer, 250 mM NaCl, pH 7, 20  $^\circ\text{C}$ , 0.7  $^\circ\text{C}/\text{min}$ .

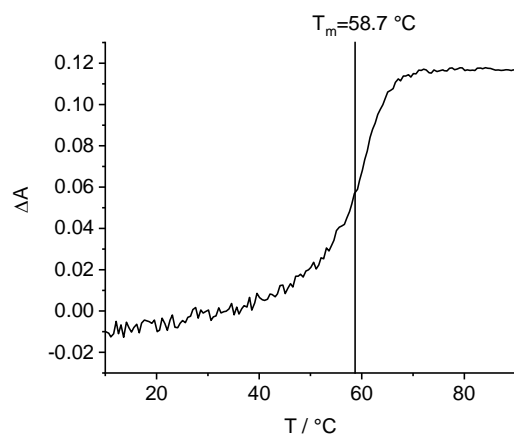

**Figure S11.** Melting profile of **RNA1-RNAS**; 2.5  $\mu\text{M}$  RNA, 10 mM Na-Pi buffer, 250 mM NaCl, pH 7, 20  $^\circ\text{C}$ , 0.7  $^\circ\text{C}/\text{min}$ .

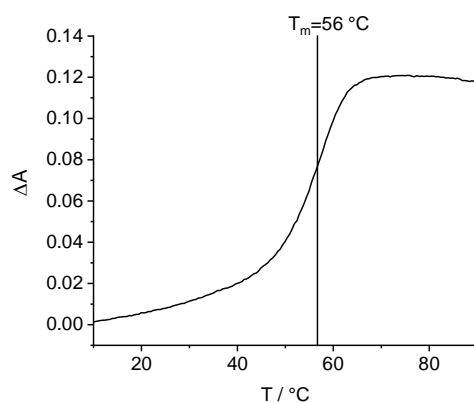

**Figure S12.** Melting profile of **RNA2D**; 2.5  $\mu\text{M}$  RNA, 10 mM Na-Pi buffer, 250 mM NaCl, pH 7, 20  $^\circ\text{C}$ , 0.7  $^\circ\text{C}/\text{min}$ .

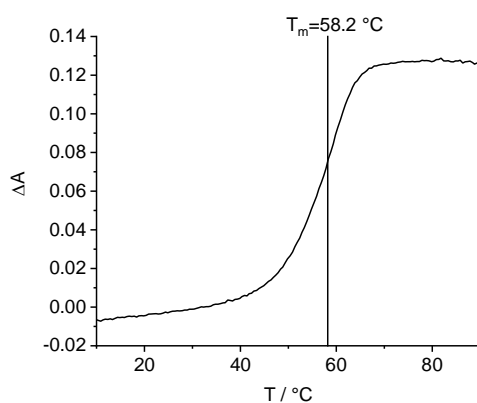

**Figure S13.** Melting profile of **RNA2-RNAA**; 2.5  $\mu\text{M}$  RNA, 10 mM Na-Pi buffer, 250 mM NaCl, pH 7, 20  $^\circ\text{C}$ , 0.7  $^\circ\text{C}/\text{min}$ .

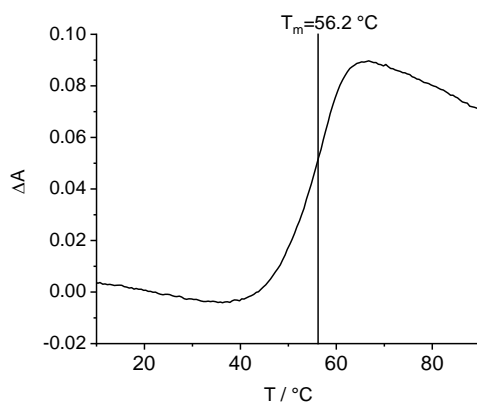

**Figure S14.** Melting profile of **RNA2-RNAC**; 2.5  $\mu\text{M}$  RNA, 10 mM Na-Pi buffer, 250 mM NaCl, pH 7, 20  $^\circ\text{C}$ , 0.7  $^\circ\text{C}/\text{min}$ .

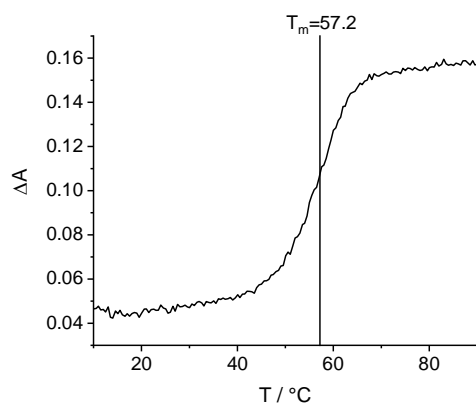

**Figure S15.** Melting profile of **RNA2-RNAG**; 2.5  $\mu\text{M}$  RNA, 10 mM Na-Pi buffer, 250 mM NaCl, pH 7, 20  $^\circ\text{C}$ , 0.7  $^\circ\text{C}/\text{min}$ .

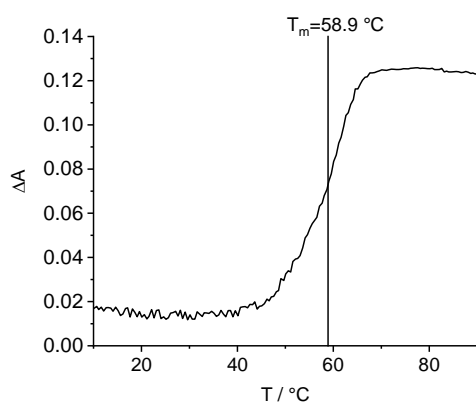

**Figure S16.** Melting profile of **RNA2-RNAU**; 2.5  $\mu\text{M}$  RNA, 10 mM Na-Pi buffer, 250 mM NaCl, pH 7, 20  $^\circ\text{C}$ , 0.7  $^\circ\text{C}/\text{min}$ .

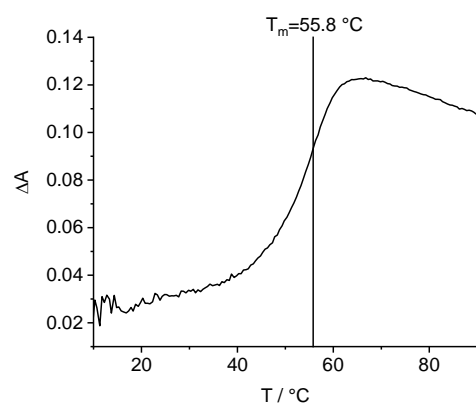

**Figure S17.** Melting profile of **RNA2-RNAS**; 2.5  $\mu\text{M}$  RNA, 10 mM Na-Pi buffer, 250 mM NaCl, pH 7, 20  $^\circ\text{C}$ , 0.7  $^\circ\text{C}/\text{min}$ .

## 5. References

- 1 M. Merkel, L. Dehmel, N. P. Ernsting, H.-A. Wagenknecht, *Angew. Chem. Int. Ed.* **2017**, 56, 384-388.
- 2 M. Weinberger, F. Berndt, R. Mahrwald, N. P. Ernsting, H.-A. Wagenknecht, *J. Org. Chem.* **2013**, 78, 2589-2599.
